# Supplementary material for: Whole-Genome Sequencing Analysis of Salmonella enterica Serovar Enteritidis Isolates in Chile Provides Insights into Possible Transmission between Gulls, Poultry, and Humans
Source: PubMed Central journal article supplement (PMC5068155; doi:10.1128/aem.01760-16), 2016-09-30
Supplement: AEM.01760-16_zam999117464so1.pdf [file AEM.01760-16_zam999117464so1.pdf]

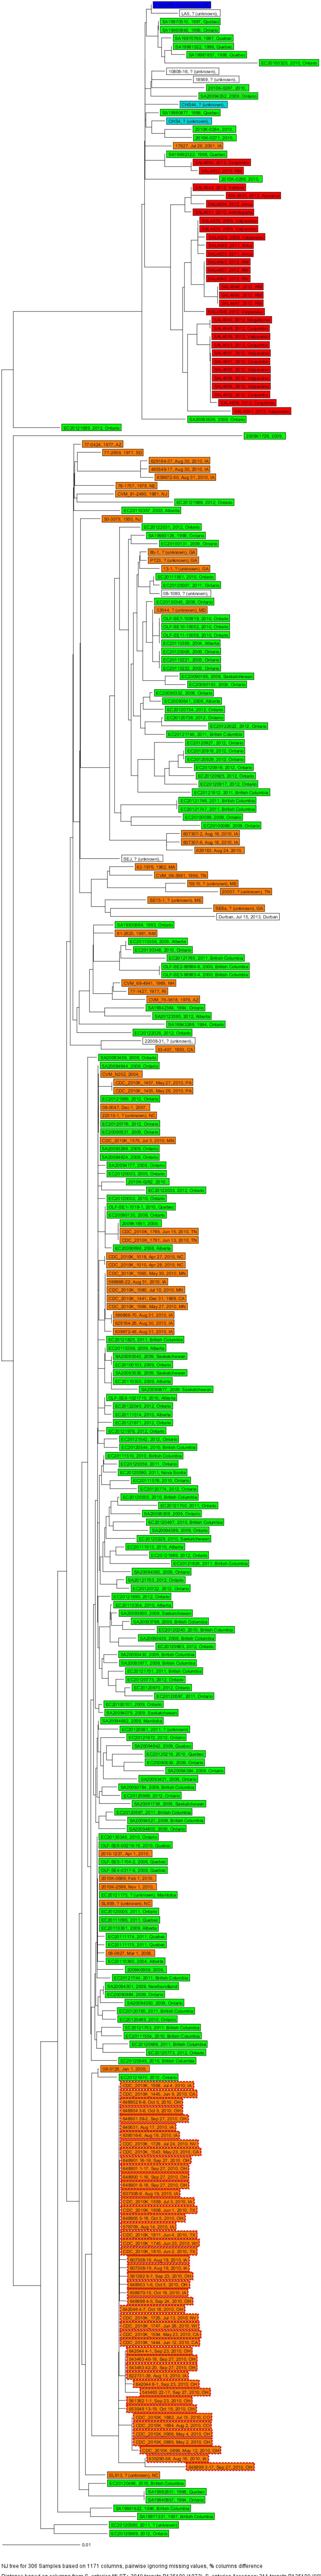

NJ tree for 306 Samples based on 1171 columns, pairwise ignoring missing values, % columns difference  
 Distance based on columns from *S. enterica* MLST+ 3849 targets P125109 (1073), *S. enterica* Accessory 311 targets P125109 (98)  
 Comparison Table definition: SE Chile and NCBI only  
 Project: S. enterica Created: Oct 5, 2015 4:08 PM  
 Task Templates: S. enterica MLST+ 3849 targets P125109, S. enterica Accessory 311 targets P125109

- Chile SE
- USA
- Canada
- China
- Refe: UK
